# Supplementary material
Source: PubMed Central journal article supplement (PMC5130549)
Supplement: Supplemental_figure_1.pdf [file Supplemental_figure_1.pdf]

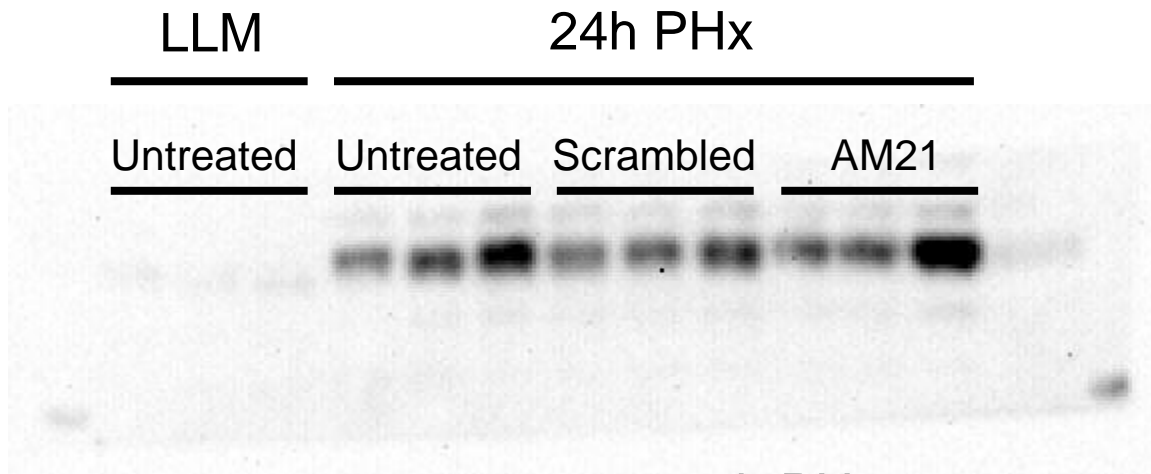

Full unedited gel for  
Figure 2  
Cyclin D1

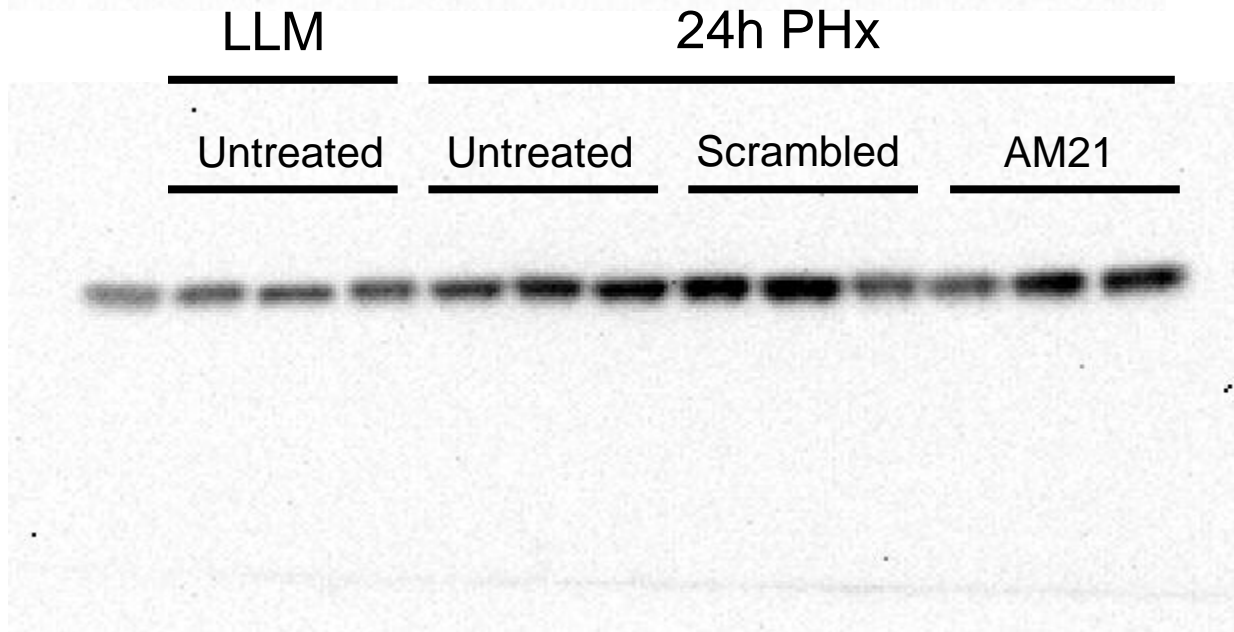

Full unedited gel for  
Figure 2  
GAPDH

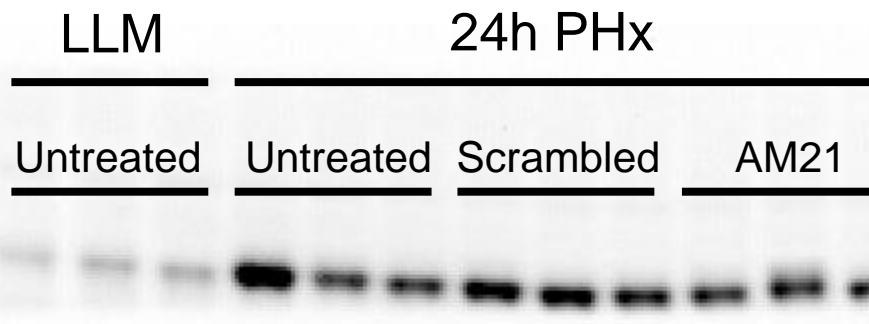

Full unedited gel for  
Figure 2  
PCNA

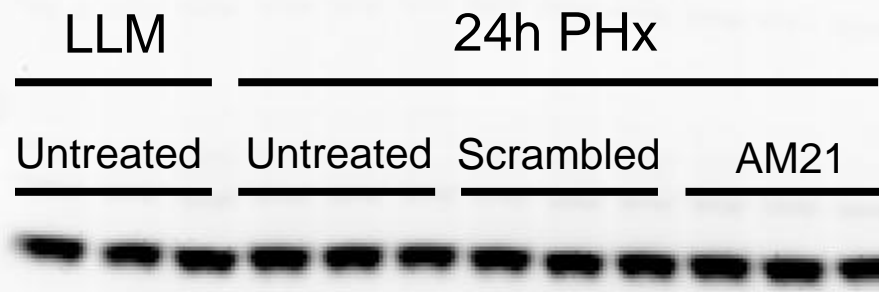

Full unedited gel for  
Figure 2  
GAPDH

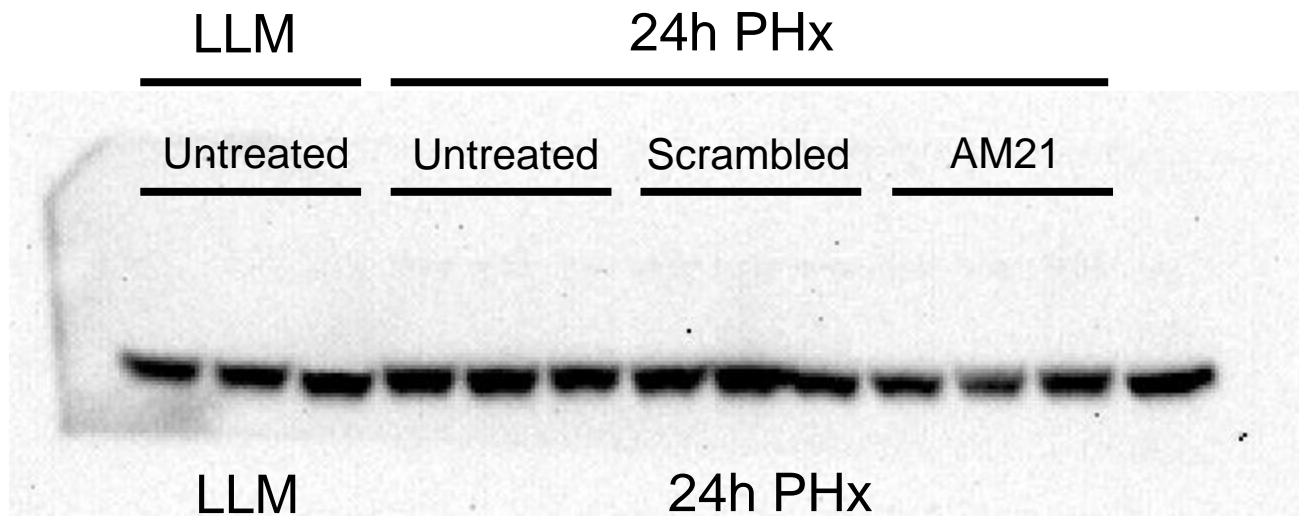

Full unedited gel for  
Figure 3  
PTEN

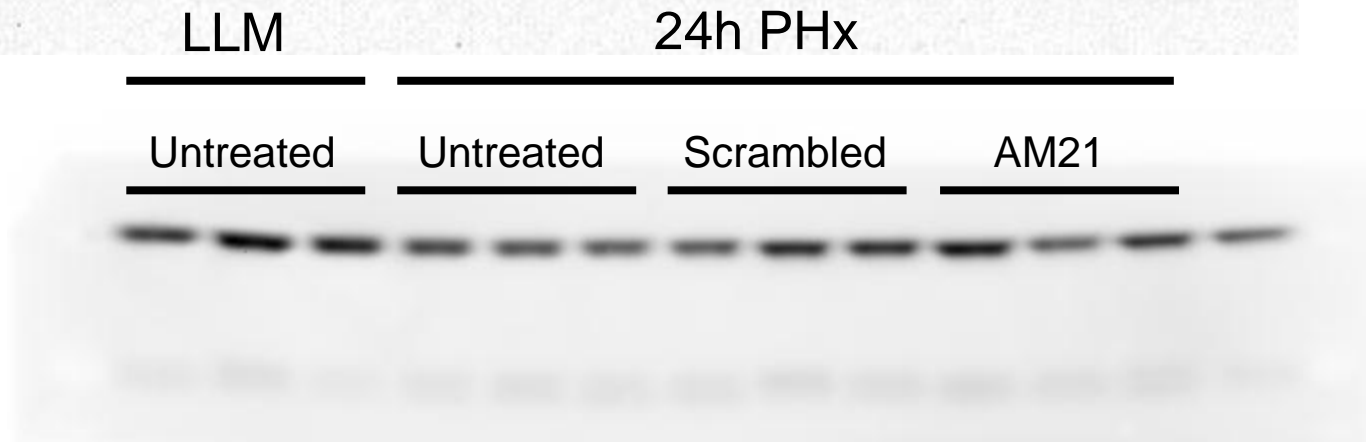

Full unedited gel for  
Figure 3  
P21

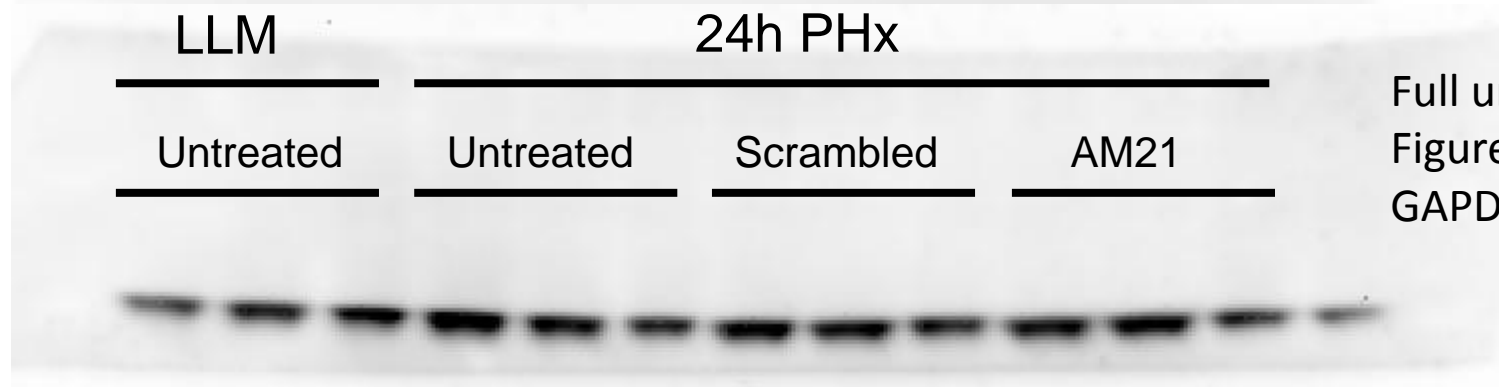

Full unedited gel for  
Figure 3  
GAPDH

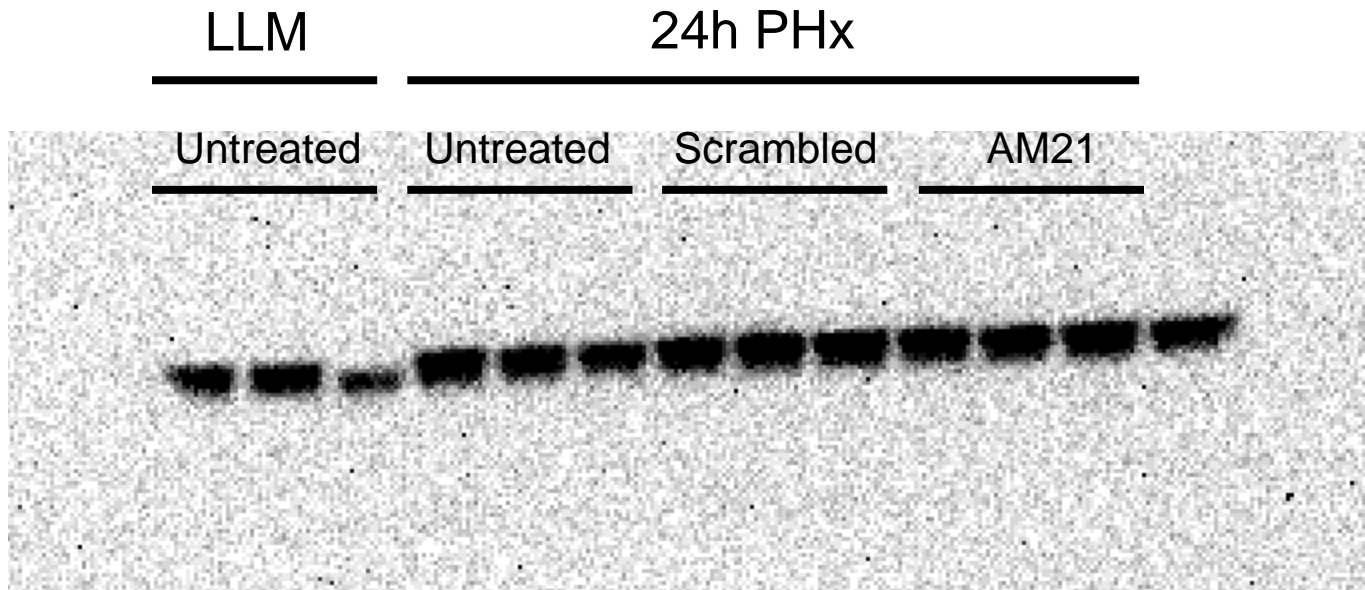

Full unedited gel for  
Figure 3  
AKT

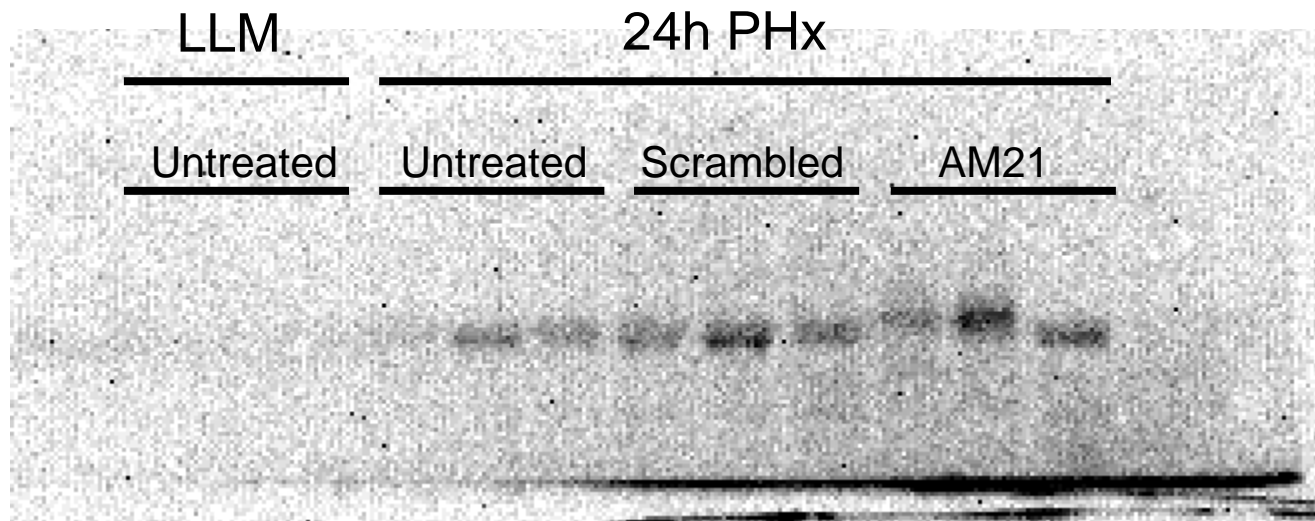

Full unedited gel for  
Figure 3  
pAKT

LLM

24h PHx

Untreated

Untreated

Scrambled

AM21

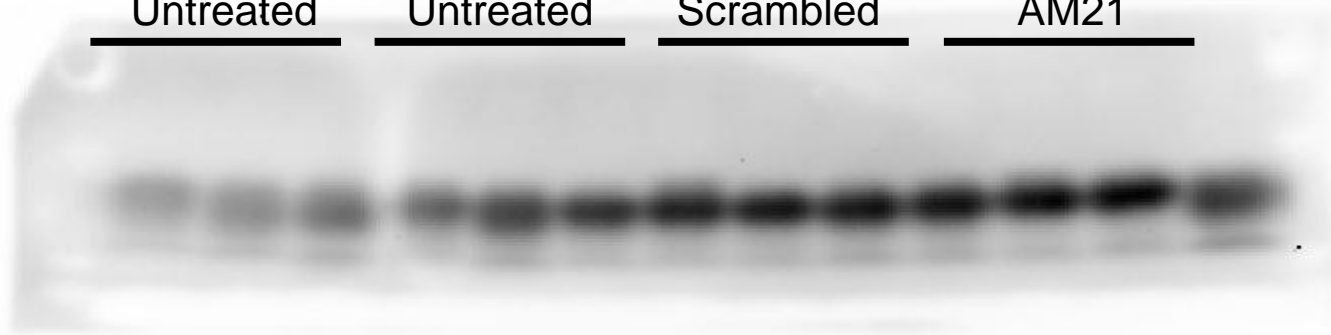

Full unedited gel for  
for Figure 3  
4EBP1

LLM

24h PHx

Untreated

Untreated

Scrambled

AM21

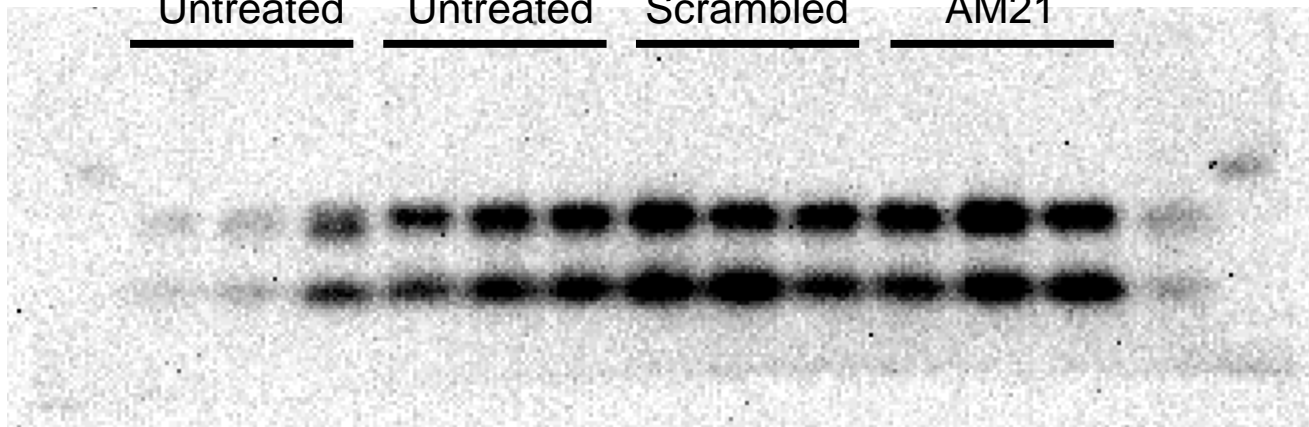

Full unedited gel for  
Figure 3  
p4EBP1
