# Supplementary material
Source: PubMed Central journal article supplement (PMC5130549)
Supplement: Supplemental_figure_2.pdf [file Supplemental_figure_2.pdf]

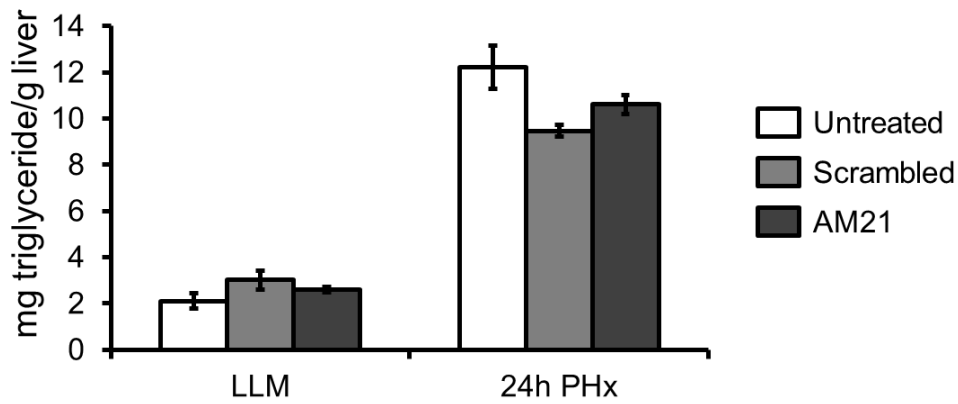

**Supporting Figure 2. AM21 treatment does not affect hepatic triglyceride levels after partial hepatectomy.** Triglyceride levels were measured using Triglyceride LiquiColor Test Kit (Stanbio Laboratory, Boerne, TX) (n=3, +/- SEM).
